# Supplementary material
Source: publisher figshare collection journal article supplement (https://asha.figshare.com/ndownloader/files/17519888)
Supplement: Supplementary file 1 [file 17519888]

## Supplemental Material S1.

*Partner groups: Methods of topic initiation, types of cohesion, number of concurrent methods.*

| Group         | #TIs | #TIs with each method (%) |                 |                 | Sub-Type Cohesion |                  |                    | NC-TIs | 1        | ≥ 2      |
|---------------|------|---------------------------|-----------------|-----------------|-------------------|------------------|--------------------|--------|----------|----------|
|               |      |                           |                 |                 |                   |                  |                    |        | Method   | Methods  |
|               |      | T-C <sup>a</sup>          | DD <sup>a</sup> | CO <sup>a</sup> | Lex <sup>b</sup>  | Ref <sup>b</sup> | Ellip <sup>b</sup> |        | of TI    | of TI    |
| Home-Partners | 85   | 44(51.7)                  | 51(60.0)        | 52(61.2)        | 38(62.3)          | 18(29.5)         | 5(8.2)             | 0(0.0) | 32(37.6) | 53(62.4) |
| Grad-Partners | 34   | 20(58.8)                  | 14(41.1)        | 23(67.6)        | 19(73.1)          | 6(2.3)           | 1(0.38)            | 0(0.0) | 13(38.2) | 21(61.8) |
| SLP-Partners  | 90   | 46(51.1)                  | 40(44.4)        | 63(70.0)        | 48(69.6)          | 15(21.7)         | 6(8.7)             | 0(0.0) | 42(46.7) | 48(53.3) |

*Note.* TI = Topic Initiation; T-C = Topic-Closing; DD = Discontinuity Device; CO = Cohesion; NC-TIs = Non-Coherent Topic Initiations; Lex = Lexical Cohesion; Ref = Referential Cohesion; Ellip = Elliptical Cohesion. Percentages do not accumulate to 100% for #TIs with each Method (T-C, DD, CO) when added, or for Subtypes of Cohesion, as multiple methods may be used concurrently.

<sup>a</sup>Multiple methods of TI may be used simultaneously. <sup>b</sup>Subtypes of cohesion may be used simultaneously.
